# Supplementary material for: Selenium Lessens Osteoarthritis by Protecting Articular Chondrocytes from Oxidative Damage through Nrf2 and NF-κB Pathways
Source: MDPI journal article supplement (doi:10.3390/ijms25052511), 2024-02-21

**Supplementary Figure S1**

The images of cartilage morphology and histology in MIA-induced OA rats with or without Se supplementation.

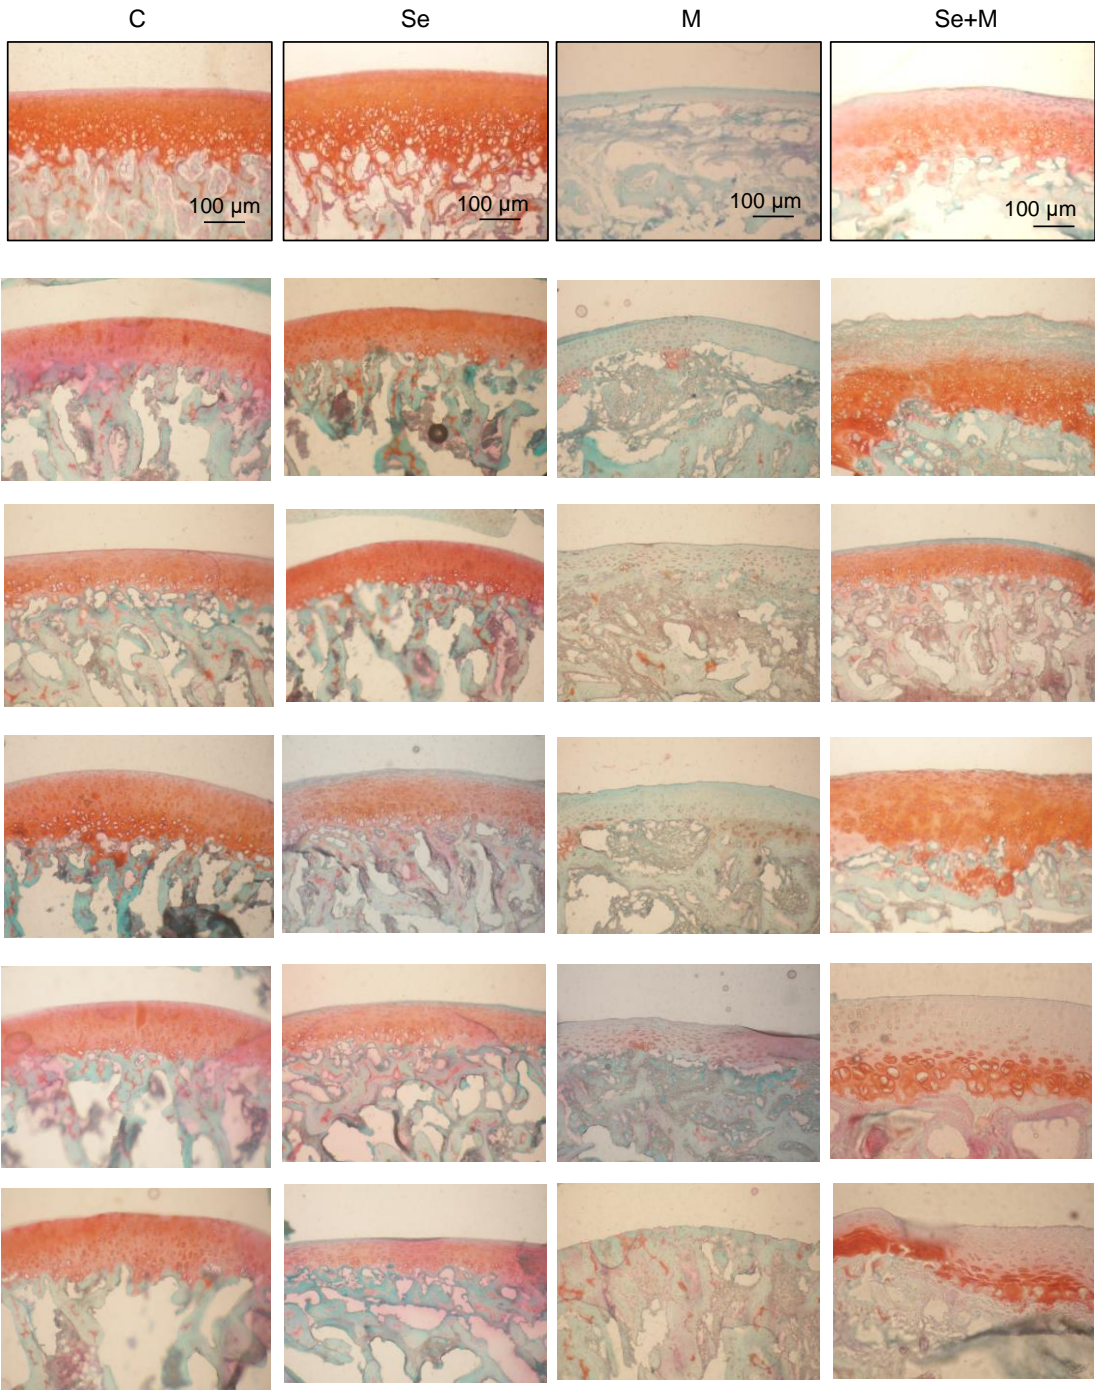

Supplement: s1 [file s1]
